# Supplementary material for: Optimizing Genetic Ancestry Adjustment in DNA Methylation Studies: A Comparative Analysis of Approaches
Source: Research Square preprint supplement (doi:10.21203/rs.3.rs-6580295/v1), 2025-05-18
Supplement: Supplementary file 1 [file 24a1b9beccdcd8309eb7628a.xlsx]

## Sheet: Sheet1
	BCBP-OCD (n = 522)	TOP (n = 313)	Grady Trauma Project (GTP) (n = 740)	UTHealth Houston (n = 226)
Collection Area	8 different clinics across Norway	Oslo region in Norway	Grady Memorial Hospital, Atlanta, GA	Greater Houston area
main phenotype	389 individuals with OCD, 133 healthy controls	189 individuals with schizophrenia spectrum disorder or bipolar disorder, 4 individuals in prodromal phase, 120 controls		154 individuals with bipolar disorder, 72 non-psychiatric controls
number of samples	up to 3 samples per individual	up to 2 samples per individual	1 sample per individual	1 sample per individual
ancestry grouping	predicted from genotyping data	predicted from genotyping data	harmonized using self-report and genotype data prediction	self-reported
Ancestry of individuals (total number of samples, including repeated samples)	EUR: 510 (1220) EAS: 5 (15) SAS: 5 (13) AFR: 1 (3) AMR: 1 (3)	EUR: 250* SAS: 39 (41) EAS: 17 (18) AFR: 7 ARA: 5 AMR: 1	EUR: 24 AFR: 716	EUR: 87 EAS/SAS: 14 AFR: 76 AMR: 2 LAT: 46 PI: 1
%female	0.6973	0.4824	0.7203	0.6902
mean age in years (+/-SD)	31.41 (+/- 9.53)	31.06 (+/- 9.12)	42.27 (+/- 12.24)	35.5 (+/- 11.01)
