# Supplementary material for: Optimizing Genetic Ancestry Adjustment in DNA Methylation Studies: A Comparative Analysis of Approaches
Source: Research Square preprint supplement (doi:10.21203/rs.3.rs-6580295/v1), 2025-05-18
Supplement: Supplementary file 2 [file 35763d53f2ac32769945a340.xlsx]

## Sheet: A) BCBP-OCD
method	PC	test	p_value	effect_size
EpiAncOrig	1	Kruskal-Wallis	0.0315064	0.00528
EpiAncOrig	2	Kruskal-Wallis	1.47261e-20	0.0762
EpiAncOrig	3	Kruskal-Wallis	0.000549747	0.01264
EpiAnceR	1	Kruskal-Wallis	1.47261e-20	0.0762
EpiAnceR	2	Kruskal-Wallis	0.00100041	0.01158
EpiAnceR	3	Kruskal-Wallis	3.06093e-05	0.01767
EpiAnceR+	1	Kruskal-Wallis	1.47261e-20	0.0762
EpiAnceR+	2	Kruskal-Wallis	1.68322e-09	0.03426
EpiAnceR+	3	Kruskal-Wallis	0.000571865	0.01257

## Sheet: B) TOP
method	PC	test	p_value	effect_size
EpiAncOrig	1	Kruskal-Wallis	1	0.07417
EpiAncOrig	2	Kruskal-Wallis	0.96838	0.08888
EpiAncOrig	3	Kruskal-Wallis	6.62012e-13	0.27168
EpiAnceR	1	Kruskal-Wallis	2.18854e-10	0.23404
EpiAnceR	2	Kruskal-Wallis	13.4219	0.05606
EpiAnceR	3	ANOVA	0.0629295	0.10983
EpiAnceR+	1	Kruskal-Wallis	1.15208e-22	0.41704
EpiAnceR+	2	Kruskal-Wallis	5.5427e-05	0.15303
EpiAnceR+	3	ANOVA	4042.95	0.04165

## Sheet: C) GTP
method	PC	test	p_value	effect_size
EpiAncOrig	1	Kruskal-Wallis	7.37183e-17	0.09291
EpiAncOrig	2	Kruskal-Wallis	2.41041e-07	0.03479
EpiAncOrig	3	Kruskal-Wallis	0.803733	-0.00127
EpiAnceR	1	Kruskal-Wallis	7.37183e-17	0.09291
EpiAnceR	2	ANOVA	0.65696	0.00027
EpiAnceR	3	Kruskal-Wallis	0.610291	-0.001
EpiAnceR+	1	Kruskal-Wallis	7.37183e-17	0.09291
EpiAnceR+	2	ANOVA	0.66734	0.00025
EpiAnceR+	3	Kruskal-Wallis	0.749434	-0.00122

## Sheet: D) UTHealth_Houston
method	PC	test	p_value	effect_size
EpiAncOrig	1	Kruskal-Wallis	3.5505e-34	0.7421
EpiAncOrig	2	Kruskal-Wallis	1.14757e-25	0.55862
EpiAncOrig	3	Kruskal-Wallis	0.0160707	0.04096
EpiAnceR	1	Kruskal-Wallis	3.5234e-24	0.52644
EpiAnceR	2	Kruskal-Wallis	1.24821e-20	0.44942
EpiAnceR	3	Kruskal-Wallis	5.3881e-16	0.34825
EpiAnceR+	1	Kruskal-Wallis	1.02144e-26	0.58133
EpiAnceR+	2	Kruskal-Wallis	2.4253e-22	0.48659
EpiAnceR+	3	Kruskal-Wallis	2.43828e-17	0.37768
